# Supplementary material
Source: MDPI journal article supplement (https://www.mdpi.com/2571-9408/6/3/173)
Supplement: s1 [file s1]

Table S1. Chronological listing of the paintings.

\* Accession numbers indicate paintings from the NGS collection. Titles without the accession numbers are from Liu family collection.

\*\* NGS – National Gallery Singapore, LF – Liu family

| Painting number | Title and inventory number*                    | Date | Owner** | Dimensions H × W (cm) | Primary support | Painted on an earlier composition | Painted on a reverse side |
|-----------------|------------------------------------------------|------|---------|-----------------------|-----------------|-----------------------------------|---------------------------|
| 1               | <i>Nude</i>                                    | 1927 | LF      | 45 × 60               | Cotton canvas   | Yes                               |                           |
| 2               | <i>St Gingolph, Lac Leman, Switzerland</i>     | 1929 | LF      | 45.5 × 37.5           | Linen canvas    |                                   |                           |
| 3               | <i>My room in Paris</i>                        | 1929 | LF      | 54 × 45.5             | Linen canvas    |                                   |                           |
| 4               | <i>Zuo La Lu</i> , 1993-00998                  | 1930 | NGS     | 46 × 55               | Linen canvas    | Yes                               |                           |
| 5               | <i>Autumn colours</i> , GI-0255 (PC)           | 1930 | NGS     | 38.3 × 45.3           | Linen canvas    | Yes                               |                           |
| 6               | <i>Countryside in France</i> , 2003-03365      | 1930 | NGS     | 46 × 54.7             | Linen canvas    |                                   |                           |
| 7               | <i>Landscape in Switzerland</i> , P-1229       | 1930 | NGS     | 45.6 × 55.7           | Linen canvas    |                                   |                           |
| 8               | <i>Street scene in France</i> , 2003–03366     | 1930 | NGS     | 46 × 54.6             | Linen canvas    | Yes                               |                           |
| 9               | <i>Farmer's house</i> , GI-0254-(PC)           | 1930 | NGS     | 45.5 × 53.5           | Linen canvas    |                                   |                           |
| 10              | <i>Landscape</i>                               | 1930 | LF      | 46 × 38               | Linen canvas    |                                   |                           |
| 11              | <i>French countryside</i>                      | 1930 | LF      | 46 × 54.5             | Linen canvas    |                                   |                           |
| 12              | <i>Cottage with blue shutters, France</i>      | 1930 | LF      | 46 × 54.5             | Linen canvas    |                                   | Yes                       |
| 13              | <i>Portrait of a man with his hat, Belgium</i> | 1930 | LF      | 55 × 45               | Linen canvas    | Yes                               |                           |
| 14              | <i>Autumn landscape</i>                        | 1930 | LF      | 38.5 × 46             | Linen canvas    |                                   |                           |
| 15              | <i>Man in blue coat, Paris</i>                 | 1930 | LF      | 46 × 37               | Linen canvas    |                                   |                           |
| 16              | <i>Village street, France</i>                  | 1930 | LF      | 46 × 55.5             | Linen canvas    | Yes                               |                           |
| 17              | <i>Village scene</i> , 2003-03320              | 1931 | NGS     | 46 × 55               | Linen canvas    |                                   |                           |
| 18              | <i>Slope</i> , 2003-03319                      | 1931 | NGS     | 46 × 55               | Linen canvas    |                                   | Yes                       |
| 19              | <i>French lady</i> , 1993-00996                | 1931 | NGS     | 60.7 × 45.8           | Linen canvas    |                                   |                           |
| 20              | <i>Boat near the cliff</i> , 2003-03249        | 1931 | NGS     | 53.7 × 72.4           | Linen canvas    |                                   |                           |
| 21              | <i>Winter</i> , GI-0256                        | 1931 | NGS     | 46 × 55               | Linen canvas    | Yes                               |                           |
| 22              | <i>Still life with books, Paris</i>            | 1931 | LF      | 45 × 38               | Linen canvas    |                                   |                           |
| 23              | <i>Portrait of a man with his pipe, Paris</i>  | 1931 | LF      | 45 × 38               | Linen canvas    |                                   | Yes                       |
| 24              | <i>Self-portrait</i>                           | 1931 | LF      | 55 × 46               | Linen canvas    |                                   | Yes                       |
| 25              | <i>Self-portrait in Paris</i>                  | 1931 | LF      | 61 × 46               | Linen canvas    | Yes                               |                           |
| 26              | <i>Boats, Etretat</i>                          | 1931 | LF      | 46 × 55               | Linen canvas    | Yes                               |                           |
| 27              | <i>Still life</i>                              | 1931 | LF      | 38.5 × 46             | Linen canvas    |                                   | Yes                       |
| 28              | <i>Breakfast</i> , GI-0257 (PC)                | 1932 | NGS     | 46 × 54               | Linen canvas    | Yes                               |                           |
| 29              | <i>Seafood</i> , 2003-03250                    | 1932 | NGS     | 46 × 55               | Linen canvas    | Yes                               |                           |
| 30              | <i>My landlady, Madame Normand</i>             | 1932 | LF      | 54 × 45               | Linen canvas    |                                   |                           |
| 31              | <i>Street</i>                                  | 1932 | LF      | 46 × 39               | Linen canvas    |                                   |                           |
| 32              | <i>Working at the fields</i> , 2003-03258      | 1933 | NGS     | 49.5 × 64             | Cotton canvas   |                                   |                           |
| 33              | <i>Countryside in China</i> , 2003-03299       | 1933 | NGS     | 60.5 × 72             | Cotton canvas   |                                   |                           |
| 34              | <i>Red and white walls</i>                     | 1933 | LF      | 55 × 45.5             | Cotton canvas   |                                   |                           |
| 35              | <i>Courtyard with tree</i>                     | 1933 | LF      | 55.5 × 45.5           | Cotton canvas   |                                   |                           |
| 36              | <i>Countryside landscape</i>                   | 1933 | LF      | 45 × 54.5             | Cotton canvas   |                                   |                           |
| 37              | <i>Autumn countryside</i>                      | 1933 | LF      | 45.5 × 54.5           | Cotton canvas   |                                   |                           |
| 38              | <i>Farmhouse and field</i>                     | 1933 | LF      | 60 × 72.5             | Cotton canvas   |                                   |                           |
| 39              | <i>Pagoda near Shanghai</i>                    | 1933 | LF      | 73 × 59               | Cotton canvas   |                                   |                           |
| 40              | <i>Courtyard, Shanghai</i>                     | 1933 | LF      | 73 × 60               | Cotton canvas   |                                   |                           |
| 41              | <i>Still life with green stool</i>             | 1933 | LF      | 56 × 46               | Linen canvas    | Yes                               |                           |
| 42              | <i>Backyard</i> , 2003-03252                   | 1934 | NGS     | 59.5 × 72.5           | Linen canvas    | Yes                               |                           |
| 43              | <i>Chinese house</i> , 2003-03328              | 1934 | NGS     | 64.5 × 50.5           | Linen canvas    |                                   |                           |
| 44              | <i>Nude</i>                                    | 1934 | LF      | 45.5 × 55             | Cotton canvas   | Yes                               |                           |
| 45              | <i>Countryside near Shanghai</i>               | 1934 | LF      | 46 × 54               | Cotton canvas   |                                   |                           |
| 46              | <i>Village lane</i>                            | 1934 | LF      | 45 × 54               | Cotton canvas   | Yes                               |                           |
| 47              | <i>Farmhouses</i>                              | 1934 | LF      | 45 × 54               | Cotton canvas   |                                   |                           |
| 48              | <i>Rustic landscape</i>                        | 1934 | LF      | 54 × 46               | Cotton canvas   | Yes                               |                           |
| 49              | <i>Pagoda</i>                                  | 1935 | LF      | 45 × 55               | Cotton canvas   | Yes                               |                           |
| 50              | <i>Seascape near Shanghai</i>                  | 1935 | LF      | 65 × 50               | Cotton canvas   | Yes                               |                           |
| 51              | <i>Waterfall</i> , 2003-03247                  | 1936 | NGS     | 65 × 50               | Linen canvas    | Yes                               |                           |
| 52              | <i>Mount Huangshan</i> , 2003–03369            | 1936 | NGS     | 66 × 50               | Cotton canvas   | Yes                               |                           |
| 53              | <i>Seaside</i> , 2003-03318                    | 1936 | NGS     | 45 × 54               | Linen canvas    | Yes                               |                           |
| 54              | <i>Nude</i> , 2003-03367                       | 1936 | NGS     | 46 × 54.5             | Cotton canvas   | Yes                               |                           |
| 55              | <i>House on the hill</i>                       | 1936 | LF      | 64 × 49               | Linen canvas    |                                   |                           |
| 56              | <i>Street market I</i>                         | 1936 | LF      | 45 × 54.5             | Linen canvas    | Yes                               |                           |
| 57              | <i>Street market II</i>                        | 1936 | LF      | 46 × 55               | Cotton canvas   | Yes                               |                           |
| 58              | <i>Seaside near Shanghai</i>                   | 1936 | LF      | 46 × 55               | Linen canvas    |                                   |                           |
| 59              | <i>Seascape</i>                                | 1936 | LF      | 50 × 64               | Cotton canvas   | Yes                               |                           |
| 60              | <i>Portrait of C.Y. Hwang</i> , P1228          | 1939 | NGS     | 61 x 46.4             | Hardboard       |                                   |                           |
| 61              | <i>Nude</i>                                    | 1940 | LF      | 38.5 × 46             | Linen canvas    | Yes                               |                           |
| 62              | <i>Malay man</i> , 2003-03244                  | 1942 | NGS     | 94 × 73               | Linen canvas    | Yes                               |                           |
| 63              | <i>Bathing in the river</i> , 2003-03291       | 1947 | NGS     | 126.5 × 86.5          | Linen canvas    |                                   |                           |
| 64              | <i>Climbing the hill</i> , 2003-03298          | 1948 | NGS     | 75 × 61               | Cotton canvas   | Yes                               |                           |



[illegible]

**Table S3.** Summary of the materials found in the paint mixtures.

\* Accession numbers indicate paintings from the NGS collection. Titles without the accession numbers are from Liu family collection.

| Title and inventory number*                   | Date | Ultramarine | Prussian blue | Cobalt blue | Cerulean blue | Cobalt violet | Manganese blue | Phthalocyanine blue | Viridian | Emerald green | Phthalocyanine green | Cr-containing yellow | Cobalt yellow | Cd-containing yellow | Cd-containing orange | Hansa yellow G | Hansa yellow 10G | Fe-containing yellow earth | Umber | Fe-containing red earth | Naphthol red AS-D | Alizarin crimson | Synthetic alizarin lake | Brazilwood | Hansa red | Geranium lake | Other organic red | Cd-containing red | Chalk | Lead white | Zinc white | Barium white | Lithopone | Titanium white | Bone black | Carbon black | Starch | Zn soap | Pb soap |  |
|-----------------------------------------------|------|-------------|---------------|-------------|---------------|---------------|----------------|---------------------|----------|---------------|----------------------|----------------------|---------------|----------------------|----------------------|----------------|------------------|----------------------------|-------|-------------------------|-------------------|------------------|-------------------------|------------|-----------|---------------|-------------------|-------------------|-------|------------|------------|--------------|-----------|----------------|------------|--------------|--------|---------|---------|--|
| Nude                                          | 1927 | x           |               |             |               |               |                |                     | x        | x             |                      | x                    |               |                      |                      |                |                  | x                          | x     |                         |                   |                  |                         |            |           |               | x                 |                   |       | x          | x          | x            | x         |                | x          |              |        |         |         |  |
| Zuo La Lu, 1993-00998                         | 1930 | x           | x             |             |               |               |                |                     | x        |               |                      | x                    |               | x                    |                      |                |                  | x                          |       | x                       |                   |                  |                         |            |           |               |                   |                   |       |            |            |              |           | x              |            |              |        |         |         |  |
| Autumn colours, GI-0255 (PC)                  | 1930 | x           | x             |             |               |               |                |                     | x        |               |                      | x                    |               |                      |                      |                |                  | x                          | x     | x                       |                   |                  |                         |            |           |               |                   |                   | x     | x          | x          |              |           | x              |            |              |        |         |         |  |
| Countryside in France, 2003-03365             | 1930 | x           | x             |             |               |               |                |                     | x        |               |                      | x                    |               |                      |                      |                |                  | x                          |       |                         |                   |                  |                         |            |           |               | x                 |                   |       | x          | x          |              |           | x              |            | x            |        |         |         |  |
| Landscape in Switzerland, P-1229              | 1930 | x           | x             |             |               |               |                |                     | x        | x             |                      | x                    | x             | x                    |                      |                |                  | x                          |       | x                       |                   |                  |                         |            |           |               | x                 |                   | x     |            | x          | x            |           | x              |            | x            | x      |         |         |  |
| Village scene, 2003-03320                     | 1931 | x           | x             |             |               |               |                |                     | x        |               |                      | x                    |               |                      |                      |                |                  | x                          |       | x                       |                   |                  |                         |            |           |               | x                 |                   | x     | x          |            |              |           | x              | x          | x            |        |         |         |  |
| French lady, 1993-00996                       | 1931 | x           | x             | x           |               |               |                |                     | x        | x             |                      | x                    |               |                      |                      |                |                  | x                          |       |                         |                   |                  |                         |            |           |               |                   |                   |       |            |            |              |           | x              | x          |              |        | x       |         |  |
| Boat near the cliff, 2003-03249               | 1931 | x           | x             | x           |               |               |                |                     | x        |               |                      | x                    |               | x                    |                      |                |                  | x                          | x     |                         |                   |                  |                         |            |           | x             |                   |                   |       | x          | x          |              |           |                | x          |              |        |         |         |  |
| Breakfast, GI-0257 (PC)                       | 1932 |             | x             |             |               |               |                |                     | x        |               |                      | x                    |               |                      |                      |                |                  | x                          |       | x                       |                   |                  |                         |            |           |               | x                 |                   | x     | x          |            |              |           | x              |            | x            |        |         |         |  |
| Seafood, 2003-03250                           | 1932 |             | x             |             |               |               |                |                     | x        | x             |                      | x                    |               |                      |                      |                | x                | x                          |       |                         |                   | x                |                         | x          | x         |               |                   |                   | x     | x          |            |              |           | x              |            | x            |        |         |         |  |
| Working at the fields, 2003-03258             | 1933 | x           | x             |             |               |               |                |                     | x        |               |                      | x                    |               |                      |                      |                |                  | x                          | x     |                         |                   |                  |                         |            |           |               |                   |                   | x     | x          | x          | x            | x         |                |            |              |        | x       |         |  |
| Countryside in China, 2003-03299              | 1933 | x           | x             |             |               |               |                |                     | x        | x             |                      | x                    |               |                      |                      |                |                  | x                          |       | x                       |                   |                  |                         |            |           |               |                   |                   | x     | x          |            |              |           |                |            |              |        |         | x       |  |
| Backyard, 2003-03252                          | 1934 | x           | x             |             |               |               |                |                     | x        |               |                      | x                    |               | x                    |                      |                |                  | x                          |       | x                       |                   |                  |                         |            |           |               |                   |                   | x     | x          | x          | x            | x         |                |            |              |        | x       |         |  |
| Chinese house, 2003-03328                     | 1934 | x           | x             |             |               |               |                |                     | x        |               |                      | x                    |               |                      |                      |                |                  | x                          | x     |                         |                   |                  |                         |            |           |               |                   |                   |       |            |            |              |           | x              |            |              |        | x       |         |  |
| Nude                                          | 1934 | x           |               |             |               |               |                |                     | x        |               |                      |                      |               |                      |                      |                |                  | x                          |       |                         |                   |                  |                         |            |           |               |                   |                   | x     |            |            | x            | x         | x              |            | x            |        | x       |         |  |
| Waterfall, 2003-03247                         | 1936 | x           | x             |             |               |               |                |                     | x        |               |                      | x                    |               |                      |                      |                |                  | x                          |       | x                       |                   |                  |                         |            |           |               |                   |                   | x     | x          | x          | x            | x         | x              |            |              |        |         |         |  |
| Seaside, 2003-03318                           | 1936 | x           | x             |             |               |               |                |                     | x        |               |                      | x                    |               |                      |                      |                |                  | x                          | x     |                         |                   |                  |                         |            |           |               |                   |                   |       |            | x          |              |           |                |            |              |        |         | x       |  |
| Nude, 2003-03367                              | 1936 | x           | x             |             |               |               |                |                     | x        |               |                      | x                    |               | x                    |                      |                |                  | x                          |       | x                       |                   |                  |                         |            |           |               |                   | x                 |       |            |            |              |           |                |            |              |        |         |         |  |
| Nude                                          | 1940 | x           | x             |             |               |               |                |                     | x        |               |                      | x                    |               | x                    | x                    |                |                  | x                          | x     |                         |                   |                  |                         |            |           |               |                   | x                 |       | x          | x          | x            | x         | x              | x          |              |        | x       |         |  |
| Climbing the hill, 2003-03298                 | 1948 | x           | x             |             |               |               |                |                     | x        |               |                      | x                    |               |                      |                      |                |                  | x                          |       |                         |                   |                  |                         |            |           |               |                   |                   |       | x          | x          | x            | x         |                |            |              |        |         |         |  |
| View from St John's Fort                      | 1948 | x           | x             |             |               |               |                |                     | x        |               |                      | x                    |               |                      |                      |                |                  | x                          |       |                         |                   |                  |                         |            |           |               |                   |                   | x     | x          | x          | x            | x         |                |            |              |        |         |         |  |
| Village, 2003-03270                           | 1950 | x           | x             |             |               |               |                |                     | x        | x             |                      | x                    |               | x                    | x                    |                |                  | x                          |       | x                       |                   |                  | x                       |            |           |               |                   | x                 |       | x          | x          |              |           |                |            |              |        |         |         |  |
| Kampong scene, 2003-03245                     | 1951 | x           | x             |             |               |               |                |                     | x        |               |                      | x                    |               | x                    |                      |                |                  | x                          | x     | x                       |                   |                  | x                       |            |           |               |                   | x                 |       |            |            |              |           |                | x          |              |        |         |         |  |
| Orchids, 2003-03379                           | 1952 | x           | x             |             |               |               |                |                     | x        | x             |                      | x                    |               | x                    |                      |                |                  | x                          | x     |                         |                   |                  |                         |            |           |               |                   |                   |       |            |            |              |           |                |            |              |        |         |         |  |
| Government Office in Johore Bahru, 2003-03300 | 1953 | x           | x             | x           | x             |               |                |                     | x        |               |                      | x                    |               | x                    |                      |                |                  | x                          | x     | x                       |                   |                  |                         |            |           |               |                   | x                 |       |            |            |              |           |                | x          |              |        | x       |         |  |
| Scene in Bali, 2003-03333                     | 1953 | x           | x             |             |               |               | x              |                     | x        |               |                      | x                    | x             | x                    |                      |                |                  | x                          |       |                         |                   |                  |                         |            |           |               |                   | x                 | x     | x          | x          | x            |           |                |            |              |        |         |         |  |
| Offerings, 2003-03269                         | 1953 | x           | x             |             |               |               |                |                     | x        |               |                      | x                    |               | x                    | x                    |                |                  | x                          |       |                         |                   |                  |                         |            |           |               |                   | x                 | x     | x          | x          | x            | x         |                |            |              |        | x       |         |  |
| Outdoor painting, 2003-03290                  | 1954 | x           | x             |             |               |               |                |                     | x        |               | x                    | x                    |               | x                    |                      |                |                  | x                          |       |                         |                   |                  |                         |            |           |               |                   | x                 |       |            |            |              |           |                |            |              |        |         |         |  |
| Painting kampong, 2003-04149                  | 1954 |             |               |             |               |               |                | x                   | x        |               |                      |                      |               | x                    |                      |                |                  |                            | x     |                         |                   |                  |                         |            |           |               | x                 | x                 |       |            |            |              |           |                | x          |              |        |         |         |  |
| Boats, 2003-03275                             | 1956 | x           | x             |             |               |               |                |                     | x        |               |                      | x                    |               | x                    |                      |                |                  | x                          |       | x                       |                   |                  |                         |            |           |               | x                 | x                 | x     |            | x          | x            | x         | x              |            |              |        |         |         |  |
| Char Siew seller, 2003-03311                  | 1958 | x           | x             |             |               |               |                |                     |          |               | x                    | x                    | x             | x                    |                      |                |                  | x                          |       |                         | x                 |                  |                         |            |           |               |                   |                   |       | x          | x          | x            | x         | x              |            |              |        | x       |         |  |
| Johor Bahru, P-0591                           | 1962 | x           |               |             |               |               |                |                     | x        |               |                      | x                    |               | x                    |                      |                |                  | x                          |       |                         |                   |                  |                         |            |           |               |                   | x                 |       |            |            |              |           |                |            |              |        |         |         |  |
| National day, 2003-03280                      | 1967 | x           | x             |             |               |               |                |                     |          |               | x                    |                      |               | x                    |                      |                |                  |                            | x     | x                       |                   |                  |                         |            |           |               |                   |                   |       |            |            |              |           |                |            |              |        |         |         |  |
| Outdoor painting, 2003-03337                  | 1968 | x           | x             |             |               | x             |                |                     | x        |               |                      |                      |               | x                    |                      |                |                  | x                          |       |                         |                   |                  |                         |            |           |               |                   |                   |       |            |            |              |           |                |            |              |        |         |         |  |
| Mountain, 2003-03246                          | 1977 | x           | x             |             |               |               |                |                     | x        |               |                      | x                    |               |                      |                      |                |                  |                            |       | x                       | x                 |                  |                         |            |           |               |                   | x                 |       |            |            | x            | x         | x              | x          |              |        |         | x       |  |

[illegible]
